# Supplementary material
Source: ML conference proceedings conference paper supplement (https://openaccess.thecvf.com/content/CVPR2025/html/Muller_Reconstructing_People_Places_CVPR_2025_paper.html)
Supplement: Supplementary file 1 [file Muller_Reconstructing_People_Places_CVPR_2025_supplemental.pdf]

# Reconstructing People, Places, and Cameras

## Supplementary Material

This is the supplementary material for our main paper “Reconstructing People, Places, and Cameras”. We provide additional qualitative results (Sec. S.1), including in-the-wild examples, a discussion of our approach’s limitations (Sec. S.2), ablation studies on the scale initialization and input views (Sec. S.3), evaluation details (Sec. S.4), implementation detail (Sec. S.5), and additional related work (Sec. S.6).

### S.1. Additional Qualitative Results

**In-the-wild demo.** We first present HSfM’s reconstruction results on images captured by two cell phones in Figures S.1 and S.2. The data was captured using a minimal setup consisting of two cell phones, two tripods, and the Riverside app<sup>1</sup> for straightforward time synchronization. Despite this simple setup, our multi-view optimization algorithm successfully handles challenging scenes, such as individuals jumping, without relying on any heuristic contact priors and small data-driven motion priors that previous works [44, 61, 69] use.

**Benchmark evaluation.** We provide additional qualitative results on EgoExo4D [17] in Figure S.4, showing challenging scenes such as kitchens, humans interacting with objects (e.g., playing the piano), and sports activities like soccer. In Figure S.7, we display further results on EgoHumans [24], demonstrating HSfM reconstructions of multiple people interacting, such as fencing. Figure S.3 show a scene from EgoHumans before and after HSfM optimization.

### S.2. Discussion

Our goal is to study the mutual benefits of jointly reconstructing humans, scenes, and cameras. To this end, we assume that the re-identification of people across camera views is known, because misidentified individuals can introduce spurious effects, disrupting the optimization process. Please note that this limitation also applies to UnCaliPose [57]. To ensure a fair comparison and maintain focus on the core objectives of this study, we rely on ground-truth identities in both our approach and UnCaliPose in the main text.

Since re-identification may not be available at test time and manual identification is cumbersome, we tested the feasibility of automating the re-identification process using the re-identification module of UnCaliPose on the EgoHumans dataset [24]. For re-identification, UnCaliPose solves a constrained clustering optimization problem, as-

suming a known number of people in the scene and utilizing re-identification features extracted by an off-the-shelf re-identification network [31]. The re-identification process achieves an accuracy of 51.22% on EgoHumans. The main failure mode occurs with individuals wearing uniforms (e.g., tennis sequences: 12.04% accuracy, volleyball sequences: 25.71% accuracy), where appearance features are difficult to distinguish.

These findings indicate that manual re-identification remains necessary for accurate multi-view reconstruction of the world, including humans. Fortunately, modern tools like LabelMe<sup>2</sup> simplify this process. Looking ahead, we anticipate that ongoing advancements in large-scale data-model paradigms will significantly improve performance in multi-view re-identification. These advancements may include robust appearance feature matching [34] and the use of geometric similarities, such as human pose and location [16, 37].

While our method achieves good quantitative results, we observe a few failure cases stemming from preprocessing errors in reconstruction and detections. The most common issues arise from erroneous initial camera estimates generated by the scene reconstruction-based SfM[53], particularly in scenes with limited structure, insufficient overlap between images, or large areas affected by radial distortion. In instances where DUST3R[53] fails to detect any cameras, we rely on human-centric camera poses to initialize the optimization. Another source of error involves missing or highly inaccurate keypoint detections, which can occur under conditions of heavy occlusion or poor lighting. In such cases, our method estimates frame-specific cameras solely based on pixel data, without incorporating human constraints. Despite these occasional errors, we find DUST3R, ViTPose [59], and HMR2.0 [16] to exhibit remarkable robustness across a wide range of challenging scenarios.

### S.3. Additional Ablation Studies

We analyze the effect of different scale initializations to validate the superiority of the human-centric scaling introduced in Section 4.1 in Table S.1. Without scale initialization ( $\alpha = 1.0$ ), where we directly use the raw DUST3R [53] scene and camera pose outputs as input to our optimization, the W-MPJPE is 11.89m, whereas ours is 1.04m. Additionally, the high metric-scale camera translation errors, such as 6.42m TE, and extremely low RRA values, demonstrate the necessity of proper initialization. This error occurs be-

<sup>1</sup><https://riverside.fm/>

<sup>2</sup><https://github.com/wkentaro/labelme>

|                        | Human Metrics |             |             |             |             |             | Camera Metrics |             |             |             |             |             |
|------------------------|---------------|-------------|-------------|-------------|-------------|-------------|----------------|-------------|-------------|-------------|-------------|-------------|
|                        | W-MPJPE↓      | GA-MPJPE↓   | PA-MPJPE↓   | TE↓         | s-TE↓       | AE↓         | RRA@10↑        | RRA@15↑     | RTA@10↑     | RTA@15↑     | s-RTA@10↑   | s-RTA@15↑   |
| S1: $\alpha = 1.0$     | 11.89         | 0.85        | 0.09        | 6.42        | 5.50        | 121.88      | 0.01           | 0.01        | 0.01        | 0.02        | 0.01        | 0.05        |
| S2: $\alpha = 100.0$   | 1.94          | 0.22        | 0.06        | 2.17        | 1.11        | 15.00       | 0.68           | 0.82        | 0.31        | 0.45        | 0.68        | 0.83        |
| <b>S3: HSfM (Ours)</b> | <b>1.04</b>   | <b>0.21</b> | <b>0.05</b> | <b>2.09</b> | <b>0.75</b> | <b>9.35</b> | <b>0.72</b>    | <b>0.89</b> | <b>0.32</b> | <b>0.46</b> | <b>0.75</b> | <b>0.91</b> |
| 2 Cam. HSfM (init)     | 3.73          | 0.42        | 0.06        | 1.53        | -           | 9.81        | 0.41           | 0.87        | 0.08        | 0.12        | -           | -           |
| 2 Cam. HSfM (Ours)     | 2.63          | 0.26        | <b>0.05</b> | <b>0.39</b> | -           | 10.37       | 0.41           | <b>0.91</b> | <b>0.48</b> | <b>0.68</b> | -           | -           |
| 4 Cam. HSfM (init)     | 4.26          | 0.51        | 0.06        | 2.36        | 1.14        | 10.96       | 0.52           | 0.79        | 0.26        | 0.38        | 0.49        | 0.74        |
| 4 Cam. HSfM (Ours)     | 1.15          | 0.27        | 0.06        | 2.00        | <b>0.71</b> | 8.92        | 0.68           | 0.88        | 0.35        | 0.50        | <b>0.78</b> | <b>0.93</b> |
| 8 Cam. HSfM (init)     | 5.06          | 0.53        | 0.06        | 2.36        | 0.96        | 7.61        | 0.71           | 0.87        | 0.25        | 0.40        | 0.65        | 0.88        |
| 8 Cam. HSfM (Ours)     | <b>1.00</b>   | <b>0.19</b> | <b>0.05</b> | 1.97        | 0.90        | <b>7.41</b> | <b>0.76</b>    | 0.90        | 0.41        | 0.54        | 0.72        | 0.88        |

Table S.1. **Ablation on the number of input view cameras.** We evaluate the performance of HSfM by varying the number of input view cameras and assessing human reconstruction and camera pose estimation in the world coordinate frame. The experiments are conducted on EgoHumans, excluding samples without ground truth camera poses for all views in the specified combinations (2, 4, and 8). Compared to the initialization, our joint optimization improves all human pose and camera pose metrics, regardless of the number of input cameras. We do not report the scaled version of camera translation errors for the 2-camera cases, as the predictions become identical to the ground truth camera translations after scale alignment.

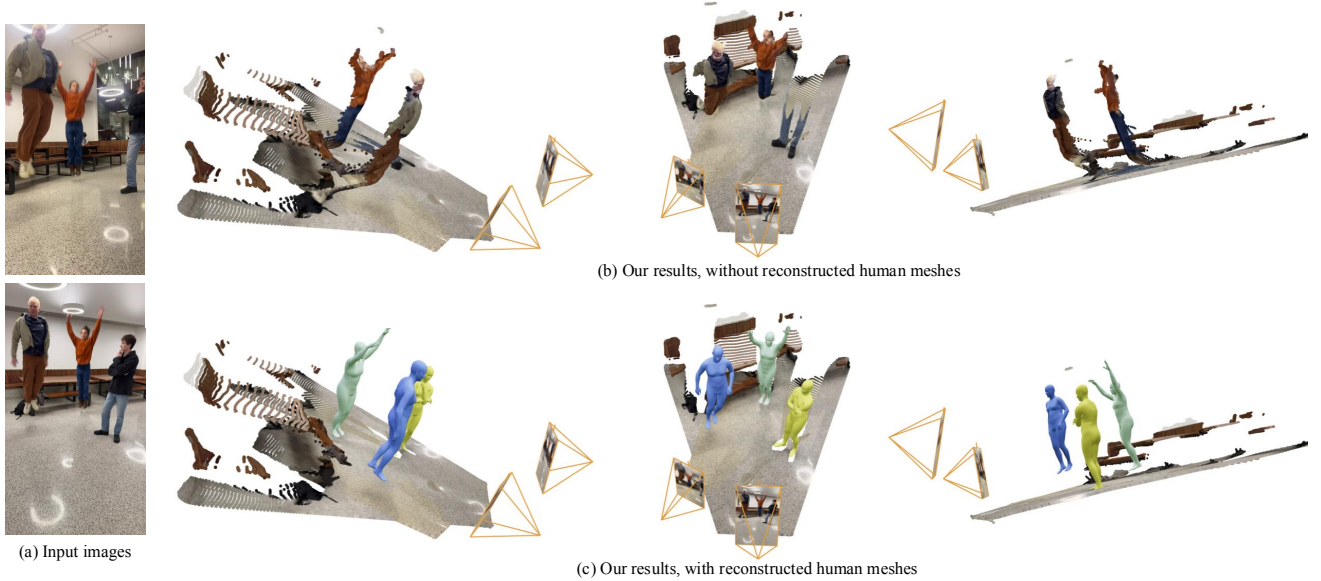

Figure S.1. **Qualitative results in the wild.** We show reconstructions on *in-the-wild* images taken with two smartphones (a), demonstrating the reconstruction of humans and scenes. Unlike previous works [61, 71], which adopt human-scene contact priors that hinder generalization to scenarios without ground foot contact, HSfM recovers accurate world locations of the human meshes that are coherent with the static scene structure. The use of humans in our framework (c) not only serves as a reliable initialization for 3D structure in the SfM formulation but also provides more faithful and complete information about people in the world, which a noisy human point cloud (b) cannot offer. For visualization purposes, the human point cloud is removed using SAM2 [38].

cause the raw camera and scene outputs have a significantly smaller scale than the real world due to their scale normalization during training.

Choosing a large scale value ( $\alpha = 100$ ) generally covers the real-world capture scene sufficiently but does not perform as well as our human-centric scaling approach (W-MPJPE: 1.94m vs. 1.04m). The camera metrics are also worse than ours (e.g., RRA values are 5–7% lower than ours). This implies that, without proper scaling, the opti-

mization is prone to failure due to poor initialization and local minima problems.

One common local minimum observed was humans being placed behind the camera while still reprojecting to the correct pixel locations. To address this, we increased the scale  $\alpha$  until all humans were placed in front of all cameras, ensuring positive depth values in all camera coordinate systems. While this initialization produced similar quantitative results in successful cases, it completely failed for 2% of

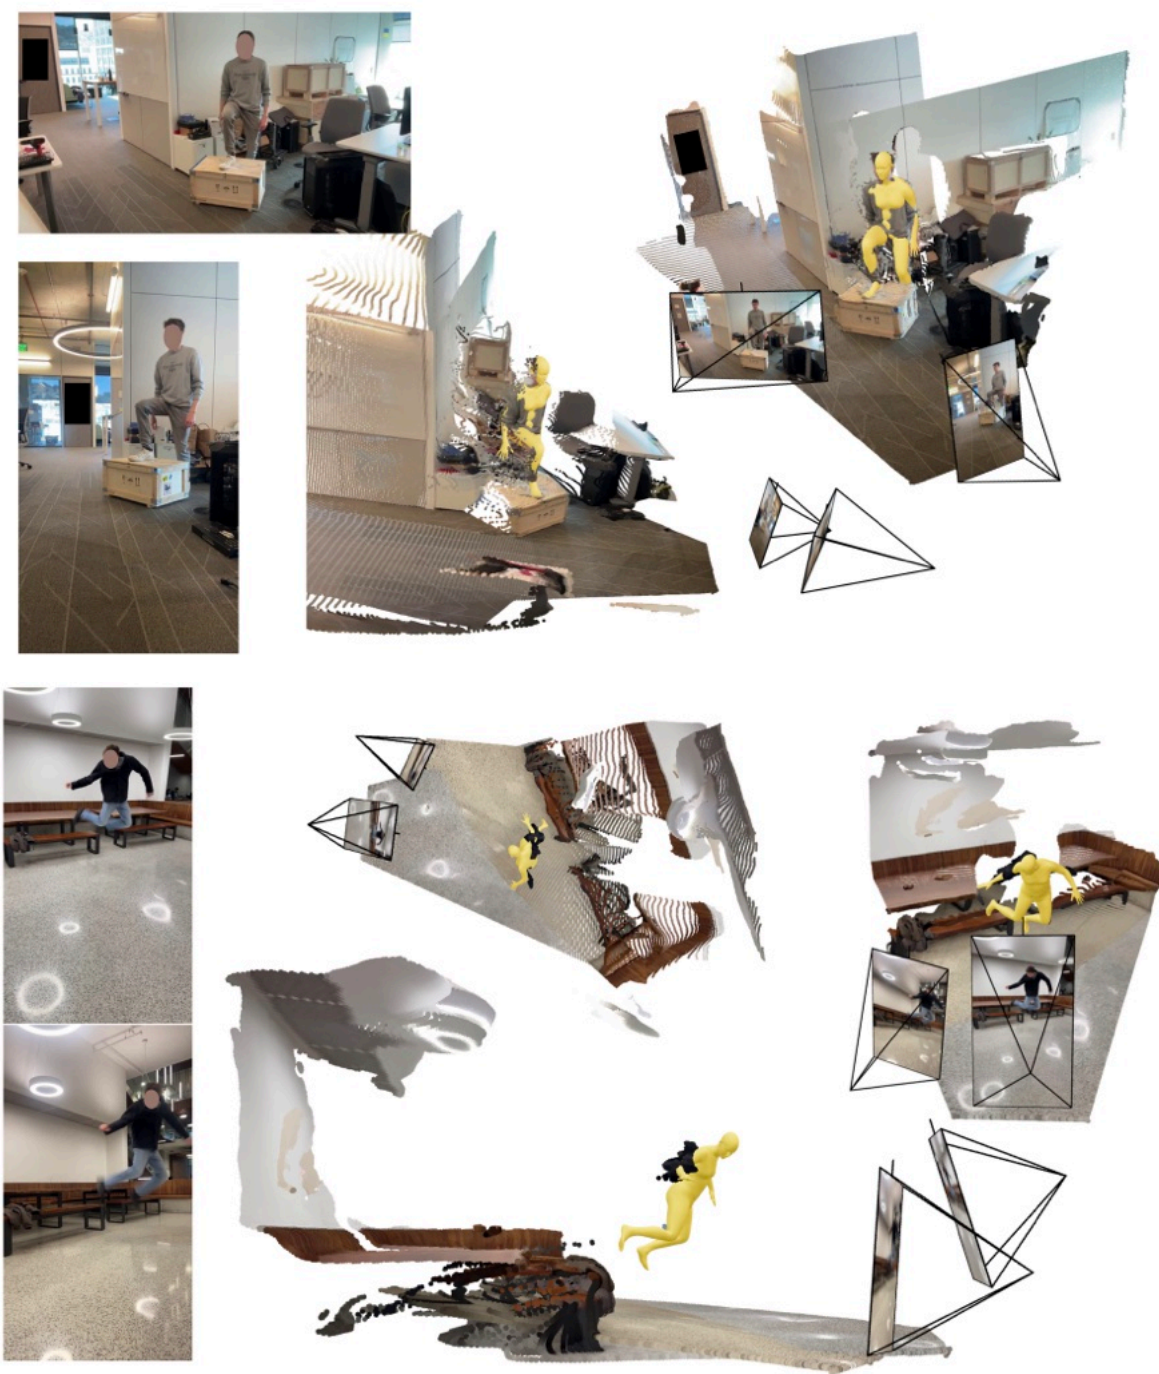

Figure S.2. **Qualitative results *in the wild*.** We show reconstructions on *in-the-wild* images taken with two cell phones and the reconstruction of humans and scene. Our method places people in the world and reconstructs accurate human-scene contact, *e.g.* between the person's right foot and box.

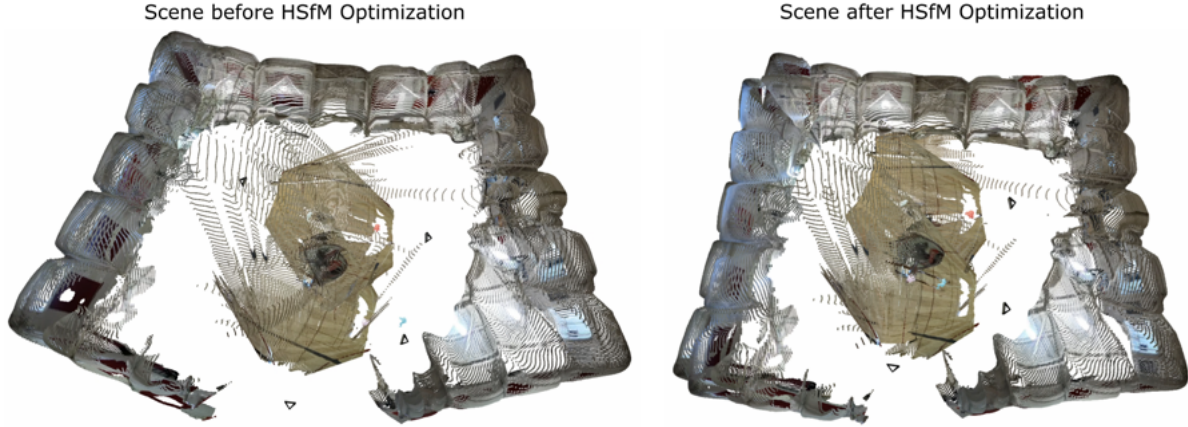

Figure S.3. **Qualitative result of HSfM reconstruction.** Top view of scene from EgoHumans before and after HSfM optimization.

samples, demonstrating that naive initialization approaches are not reliable.

Next, we vary the number of cameras to evaluate the robustness of our method. We tested 2, 4, and 8 input view cameras. As indicated in the table, our joint optimization consistently improves all metrics, regardless of the number of input view cameras. With only 2 cameras, W-MPJPE is 2.63m and GA-MPJPE is 0.26m, indicating accurate human placement in the world. The consistently better camera results compared to the initialization further validate the benefit of incorporating humans into the traditional SfM formulation. The robustness of our method is further demonstrated qualitatively in Figure S.2, where the data is captured by two cameras in in-the-wild scenes.

## S.4. Evaluation Details

### S.4.1. Evaluation Metrics

In this section, we provide additional details about our human pose and camera metrics.

**W-MPJPE** describes the mean per-joint position error, measured in the world frame. To bring predicted human meshes into the ground-truth’s world coordinate system, we use an SE(3) rigid alignment from the estimated camera positions to the ground-truth camera positions.

**PA-MPJPE** describes the Procrustes-aligned variant of MPJPE, which measures position errors after Sim(3) alignment of joints for each human. This metric evaluates local pose accuracy in a way that is not dependent on camera position estimates or human body scale.

**GA-MPJPE** evaluates group-aligned joint position errors, computed after Sim(3) alignment for all humans in a scene. This measures people relative to each other, without considering the scene or camera positions.

**TE** measures the mean Euclidean distance between predicted and ground truth camera positions, after SE(3) align-

ment. TE evaluates metric accuracy of camera positions.

**s-TE** is the scale-aligned version of TE, where we preprocess positions with Sim(3) instead of SE(3) alignment. This measures scale-invariant errors for estimated cameras.

**AE** measures the average Angle Error between camera pairs. We compute relative orientations for each pair of cameras in a scene. We then measure the difference between ground-truth and predicted pairwise orientations, convert to degrees, and average.

**CCA** [27] measures the Camera Center Accuracy, after the SE(3) alignment process used for TE.  $CCA@τ$  is the proportion of camera positions with absolute error within  $τ\%$  of the overall scene scale. Following existing work, we compute the scene scale as the furthest distance between a ground-truth camera and the centroid.

**s-RTA** measures the the scale-aligned version of RTA, after the Sim(3) alignment process used for s-TE.

**RRA** [52] measures the Relative Rotation Accuracy of camera estimates, computed using the same camera pairs as AE.  $RRA@τ$  is the proportion of pairwise camera orientations with angular error of  $τ$  degrees or lower.

### S.4.2. Evaluation Datasets

**EgoHumans:** In the main text’s tables and Table S.1’s 4 view case, we used the following camera configurations for each sequence:

- For 01\_tagging sequences: camera 1, camera 4, camera 6, and camera 8.
- For 02\_lego sequences: camera 2, camera 3, camera 4, and camera 6.
- For 03\_fencing sequences: camera 4, camera 5, camera 10, and camera 13.
- For 04\_basketball sequences: camera 1, camera 3, camera 4, and camera 8.
- For 05\_volleyball sequences: camera 2, camera 4, camera 8, and camera 11.

- For 06.badminton sequences: camera 1, camera 2, camera 5, and camera 7.
- For 07.tennis sequences: camera 4, camera 9, camera 12, and camera 20.

In Table S.1's 2 view case, we used the following camera configurations for each sequence:

- For 01.tagging sequences: camera 1 and camera 2.
- For 02.lego sequences: camera 3 and camera 5.
- For 03.fencing sequences: camera 5 and camera 13.
- For 04.basketball sequences: camera 2 and camera 7.
- For 05.volleyball sequences: camera 6 and camera 12.
- For 06.badminton sequences: camera 5 and camera 7.
- For 07.tennis sequences: camera 9 and camera 12.

In Table S.1's 8 view case, we used the following camera configurations for each sequence:

- For 01.tagging sequences: all 8 available cameras.
- For 02.lego sequences: all 8 available cameras.
- For 03.fencing sequences: camera 1, camera 3, camera 5, camera 7, camera 9, camera 11, camera 13, camera 15.
- For 04.basketball sequences: all 8 available cameras.
- For 05.volleyball sequences: camera 1, camera 3, camera 5, camera 7, camera 9, camera 11, camera 13, camera 15.
- For 06.badminton sequences: camera 1, camera 3, camera 5, camera 7, camera 9, camera 11, camera 13, camera 15.
- For 07.tennis sequences: camera 1, camera 3, camera 5, camera 7, camera 9, camera 11, camera 13, camera 15.

**EgoExo4D:** EgoExo4D scenes are typically captured using four to six RGB cameras and an egocentric device (Aria glasses). For our experiments and the baselines, we use only the RGB images from sequences with correct re-identification. Sequences containing ego-centric RGB views, such as helmet-mounted cameras, are excluded. We evaluate 182 videos from the validation set, sampling one random frame per video. The videos include ground-truth annotations for human poses, locations, and camera parameters. We evaluate on the following takes/frames:

cmu\_soccer06\_3/1426  
cmu\_soccer12\_2/6807  
cmu\_soccer16\_2/6373  
georgiatech.bike\_06\_12/170  
georgiatech.bike\_06\_2/97  
georgiatech.bike\_06\_6/74

georgiatech.bike\_06\_8/15  
georgiatech.bike\_07\_10/28  
georgiatech.bike\_07\_12/38  
georgiatech.bike\_07\_2/97  
georgiatech.bike\_07\_4/46  
georgiatech.bike\_07\_6/67  
georgiatech.bike\_07\_8/138  
georgiatech.bike\_14\_12/593  
georgiatech.bike\_14\_2/1214  
georgiatech.bike\_14\_6/575  
georgiatech.bike\_14\_8/97  
georgiatech.bike\_15\_2/1508  
georgiatech.bike\_15\_4/844  
georgiatech.bike\_15\_6/1103  
georgiatech.bike\_15\_8/3153  
georgiatech.bike\_16\_2/882  
georgiatech.bike\_16\_6/3031  
georgiatech.bike\_16\_8/1274  
georgiatech.covid\_02\_10/2227  
georgiatech.covid\_02\_12/6974  
georgiatech.covid\_02\_14/2926  
georgiatech.covid\_02\_2/67  
georgiatech.covid\_02\_4/67  
georgiatech.covid\_04\_10/999  
georgiatech.covid\_04\_12/6160  
georgiatech.covid\_04\_4/2996  
georgiatech.covid\_04\_6/4528  
georgiatech.covid\_06\_2/47  
georgiatech.covid\_06\_4/64  
georgiatech.covid\_18\_10/5524  
georgiatech.covid\_18\_12/3457  
georgiatech.covid\_18\_2/2413  
georgiatech.covid\_18\_4/3534  
georgiatech.covid\_18\_6/4389  
georgiatech.covid\_18\_8/458  
iiith.cooking\_59\_2/7795  
iiith.cooking\_64\_2/298  
iiith.cooking\_89\_6/1177  
iiith.cooking\_90\_4/1383  
iiith.soccer\_015\_2/1610  
nus.cpr\_12\_1/1338  
nus.cpr\_12\_2/76  
sfu.basketball012\_10/774  
sfu.basketball012\_12/399  
sfu.basketball012\_2/945  
sfu.basketball012\_3/1506  
sfu.basketball012\_4/66  
sfu.basketball012\_6/526  
sfu.basketball012\_7/1581  
sfu.basketball012\_8/329  
sfu.basketball016\_2/247  
sfu.basketball\_04\_8/209  
sfu.basketball\_05\_22/1902

sfu.basketball.05.26/29  
sfu.basketball.09.11/32  
sfu.basketball.09.12/1114  
sfu.cooking028.12/1049  
sfu.cooking\_007.7/77  
sfu.cooking\_008.3/4164  
sfu.cooking\_008.5/3559  
sfu.covid.004.2/2828  
sfu.covid.004.4/5360  
sfu.covid.008.16/1595  
unc.basketball.02-24-23.01.3/84  
unc.basketball.02-24-23.02.10/466  
unc.basketball.02-24-23.02.11/927  
unc.basketball.03-30-23.02.10/45  
unc.basketball.03-30-23.02.14/7  
unc.basketball.03-30-23.02.15/40  
unc.basketball.03-30-23.02.17/9  
unc.basketball.03-30-23.02.18/20  
unc.basketball.03-30-23.02.19/7  
unc.basketball.03-30-23.02.4/107  
unc.basketball.03-30-23.02.5/25  
unc.basketball.03-30-23.02.7/1141  
uniandes.basketball.001.23/768  
uniandes.basketball.001.24/1386  
uniandes.basketball.001.26/146  
uniandes.basketball.001.27/439  
uniandes.basketball.003.38/32  
uniandes.basketball.004.23/369  
uniandes.basketball.004.44/261  
uniandes.basketball.004.45/667  
uniandes.dance.002.11/201  
uniandes.dance.002.2/439  
uniandes.dance.008.29/276  
uniandes.dance.008.30/166  
uniandes.dance.008.31/31  
uniandes.dance.008.32/11  
uniandes.dance.008.33/1105  
uniandes.dance.008.34/753  
uniandes.dance.008.35/607  
uniandes.dance.008.36/1045  
uniandes.dance.008.37/913  
uniandes.dance.008.38/706  
uniandes.dance.016.10/841  
uniandes.dance.016.11/279  
uniandes.dance.016.12/932  
uniandes.dance.016.13/453  
uniandes.dance.016.14/951  
uniandes.dance.016.30/577  
uniandes.dance.016.31/1709  
uniandes.dance.016.32/377  
uniandes.dance.016.33/1158  
uniandes.dance.016.36/1247  
uniandes.dance.016.37/145

uniandes.dance.016.38/1416  
uniandes.dance.016.39/399  
uniandes.dance.016.3/1239  
uniandes.dance.016.42/1406  
uniandes.dance.016.43/1271  
uniandes.dance.016.44/1268  
uniandes.dance.016.45/838  
uniandes.dance.016.6/1361  
uniandes.dance.016.7/1040  
uniandes.dance.016.8/1488  
uniandes.dance.017.6/1592  
uniandes.dance.019.17/1003  
uniandes.dance.019.18/509  
uniandes.dance.019.19/1537  
uniandes.dance.019.20/1089  
uniandes.dance.019.22/81  
uniandes.dance.019.24/484  
uniandes.dance.019.25/183  
uniandes.dance.019.26/1814  
uniandes.dance.019.27/283  
uniandes.dance.019.28/1411  
uniandes.dance.019.46/412  
uniandes.dance.019.47/790  
uniandes.dance.019.49/1617  
uniandes.dance.019.51/481  
uniandes.dance.019.52/875  
uniandes.dance.019.54/766  
uniandes.dance.019.55/679  
uniandes.dance.019.56/561  
uniandes.dance.019.57/1073  
uniandes.dance.019.58/192  
uniandes.dance.024.11/1619  
uniandes.dance.024.12/104  
uniandes.dance.024.13/1419  
uniandes.dance.024.14/1180  
uniandes.dance.024.15/378  
uniandes.dance.024.16/1569  
uniandes.dance.024.17/1317  
uniandes.dance.024.45/844  
uniandes.dance.024.47/732  
uniandes.dance.024.48/261  
uniandes.dance.024.49/325  
upenn.0706.Dance.4.2/2512  
upenn.0706.Dance.4.3/1277  
upenn.0706.Dance.4.4/1670  
upenn.0706.Dance.4.5/1904  
upenn.0713.Dance.3.2/164  
upenn.0713.Dance.3.3/586  
upenn.0713.Dance.3.4/0  
upenn.0713.Dance.3.5/243  
upenn.0713.Dance.4.2/125  
upenn.0713.Dance.4.3/1280  
upenn.0713.Dance.4.4/308

upenn\_0713\_Dance\_4\_5/262  
upenn\_0713\_Dance\_5\_4/238  
upenn\_0713\_Dance\_5\_6/2534  
upenn\_0721\_Piano\_1\_2/140  
upenn\_0721\_Piano\_1\_3/648  
upenn\_0722\_Piano\_1\_2/83  
upenn\_0727\_Partner\_Dance\_3\_1\_2/62  
utokyo\_pcr\_2001\_29\_2/5799  
utokyo\_pcr\_2001\_29\_4/3491  
utokyo\_pcr\_2001\_29\_6/550  
utokyo\_pcr\_2001\_30\_2/2121  
utokyo\_pcr\_2001\_30\_4/1696  
utokyo\_pcr\_2001\_32\_2/6641  
utokyo\_pcr\_2001\_32\_4/6048  
utokyo\_soccer\_8000\_43\_2/3262  
utokyo\_soccer\_8000\_43\_4/3472  
utokyo\_soccer\_8000\_43\_6/2781

## S.5. Implementation Details

Given sparse-view images, HSfM jointly estimates SMPL-X [35] parameters for humans, scene pointmaps, and camera poses (rotation and translation), in the world coordinate frame. The SMPL-X parameters for humans are initialized using predictions from HMR2 [16] converted to SMPL-X following the conversion procedure in [33]. Scene pointmaps and camera parameters are initialized with estimates from DUST3R [53]. We use Adam [25] optimizer and set the number of optimization steps proportional to the scene scale with a minimum of 500 steps. This allows sufficient time to accurately determine scene scale and camera poses and people’s location. The learning rate is set to 0.015 with a linear reduction schedule. To tune hyperparameters, we use the first frame (4 cameras) of sequences 01\_tagging and 04\_basketball of EgoHumans as these scene encompass a good range of scene scales.

## S.6. Additional related work

**Monocular Human Mesh Reconstruction.** Most methods estimate 3D humans in the camera coordinate system for a single person [14, 16, 23, 35] or for multiple people with depth estimation [2, 46, 67]. Recent works jointly estimate human and camera motion in the world coordinate frame [29, 43, 44, 47, 54, 61, 65, 69]. They leverage temporal dynamics from video sequences to improve reconstruction quality over time. While single-view reconstruction methods are valuable for their minimal input requirements, they often suffer from ambiguity, especially due to occlusion. Our approach leverages multi-view data to enhance reconstruction accuracy and integrates scene context, providing a more detailed and reliable reconstruction of multi-person interactions within their environment.

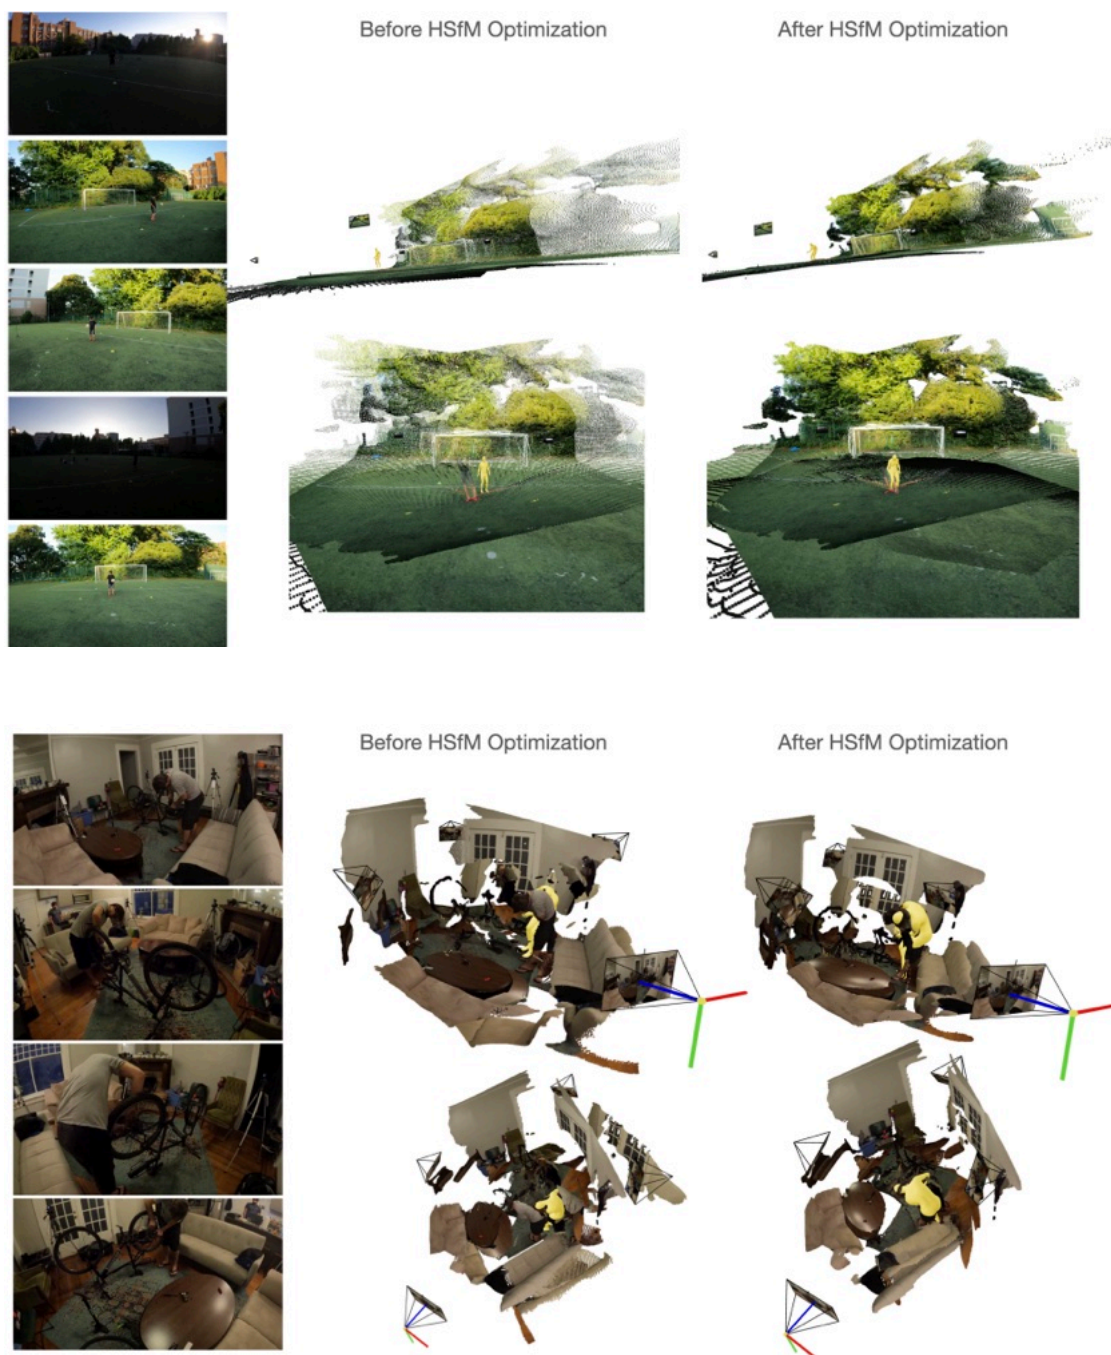

Figure S.4. **Qualitative results.** We show reconstruction on EgoExo4D. On the left, the input images to our method, the scene, humans, and cameras before optimization (HSfM (init.)) in the center, and the reconstruction of our method after joint optimization on the right.

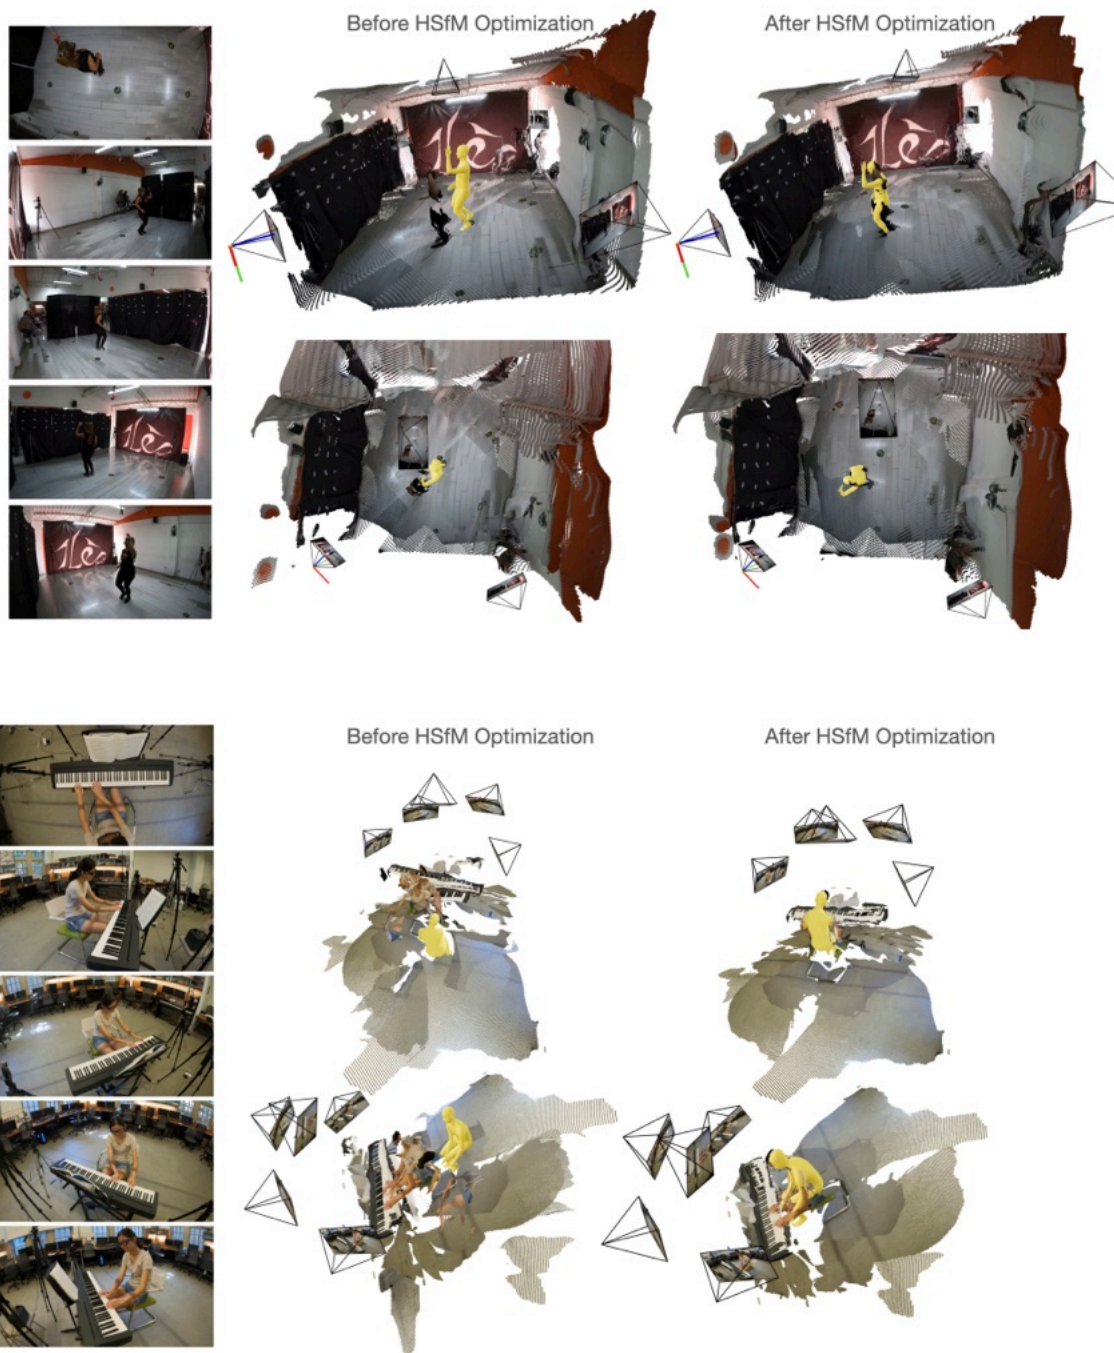

Figure S.5. Continuation of Fig. S.4

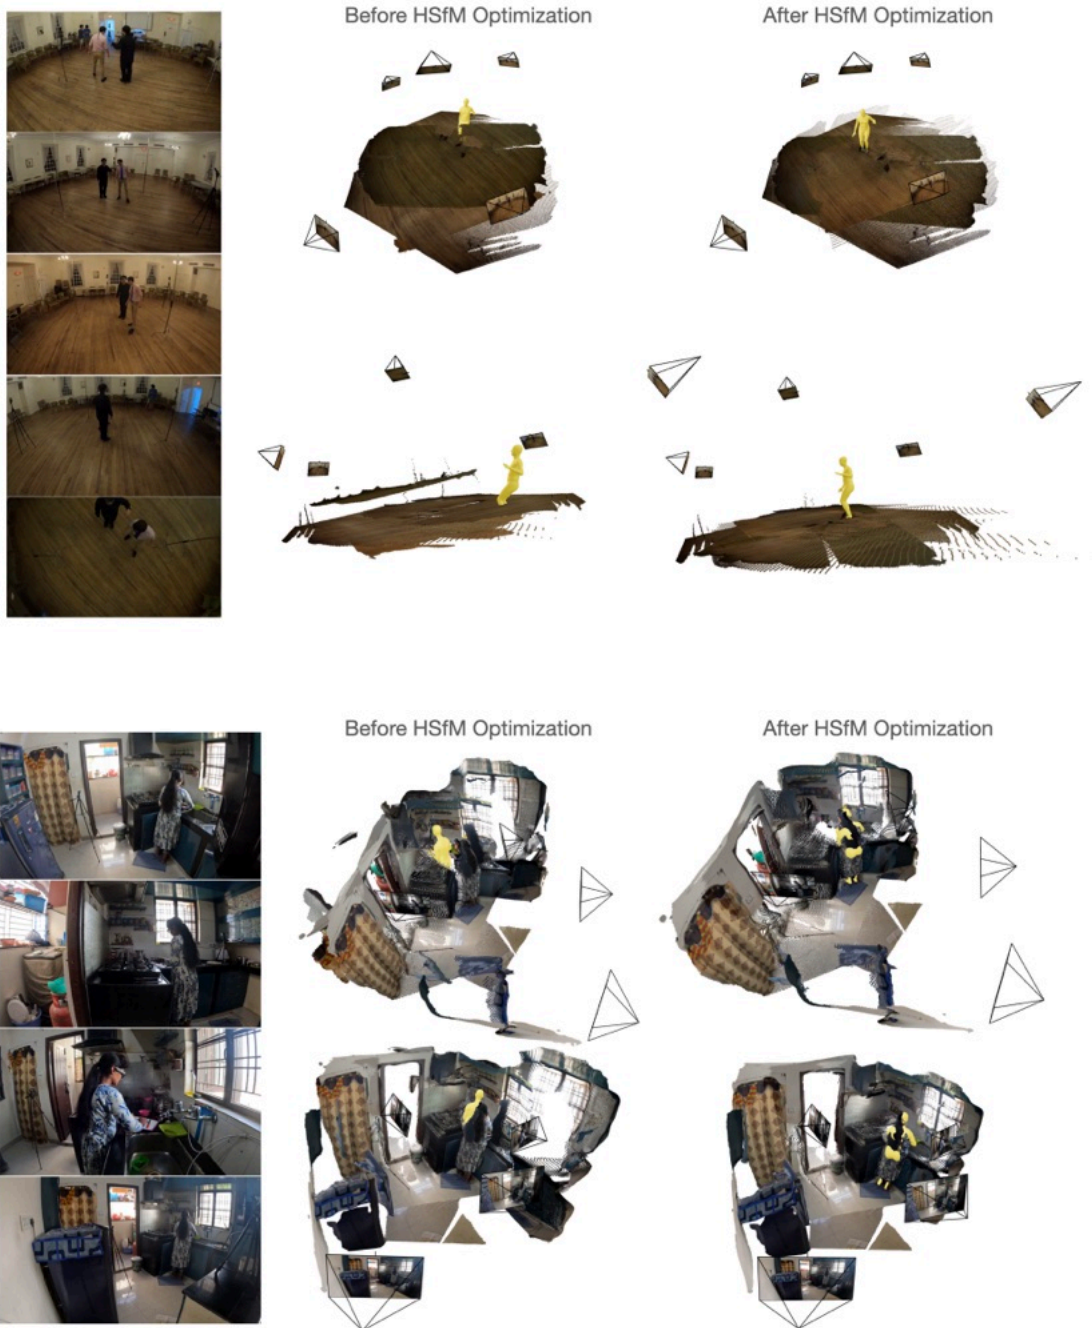

Figure S.6. Continuation of Fig. S.4

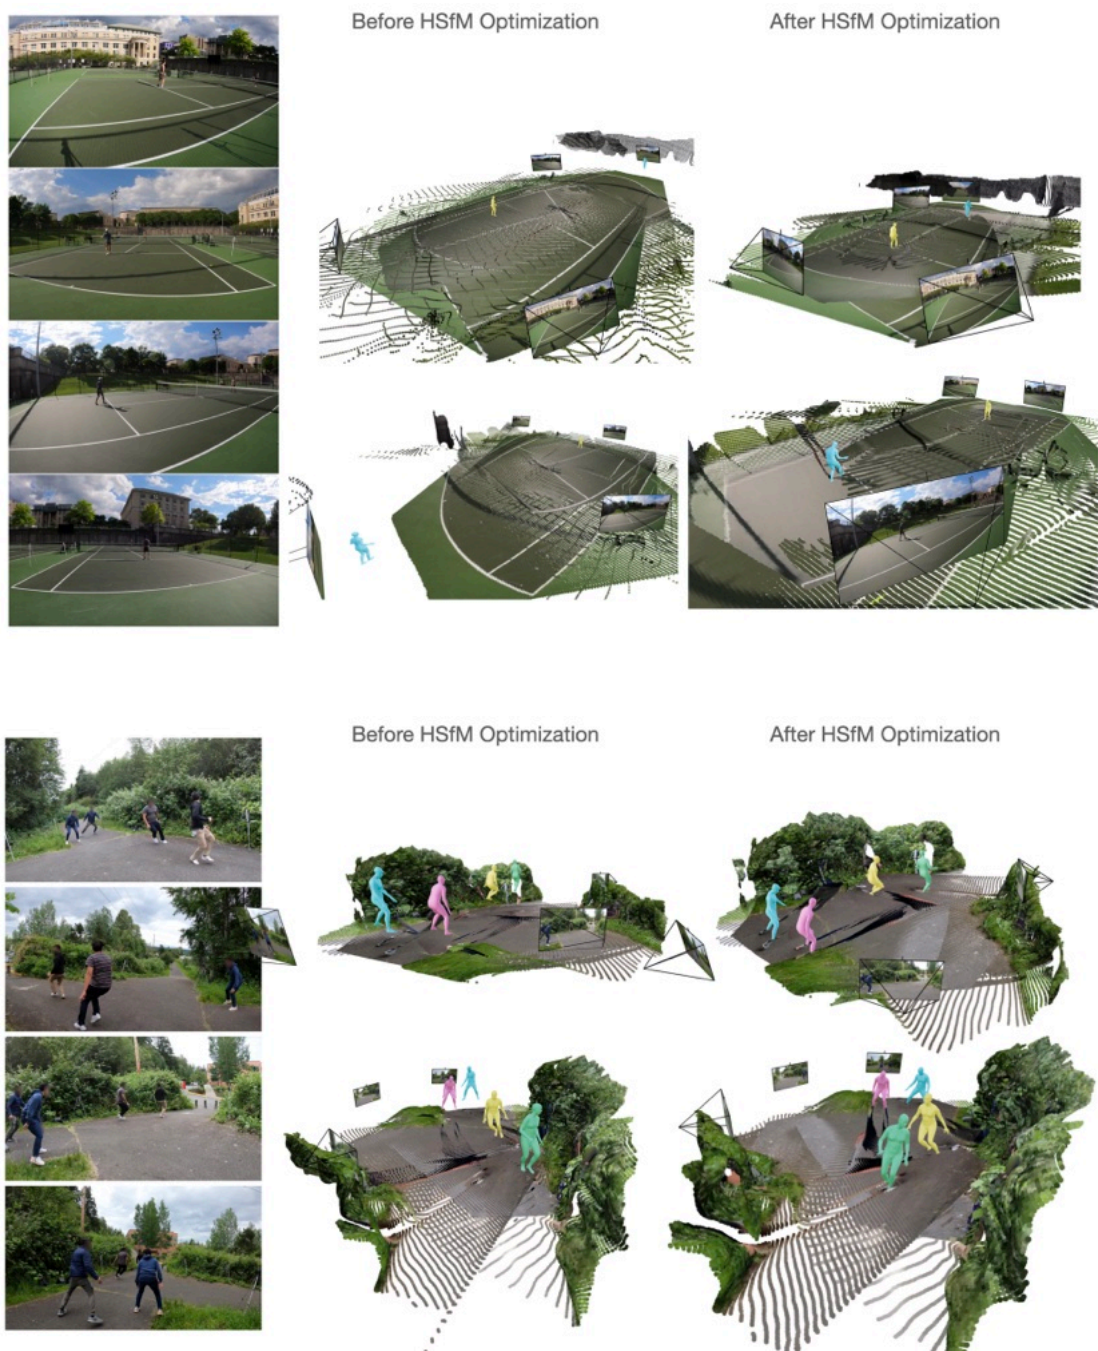

Figure S.7. **Qualitative results.** We show reconstructions on EgoHumans. On the left, the input images to our method, the scene, humans, and cameras before optimization (HSfM (init.)) in the center, and the reconstruction of our method after joint optimization on the right.

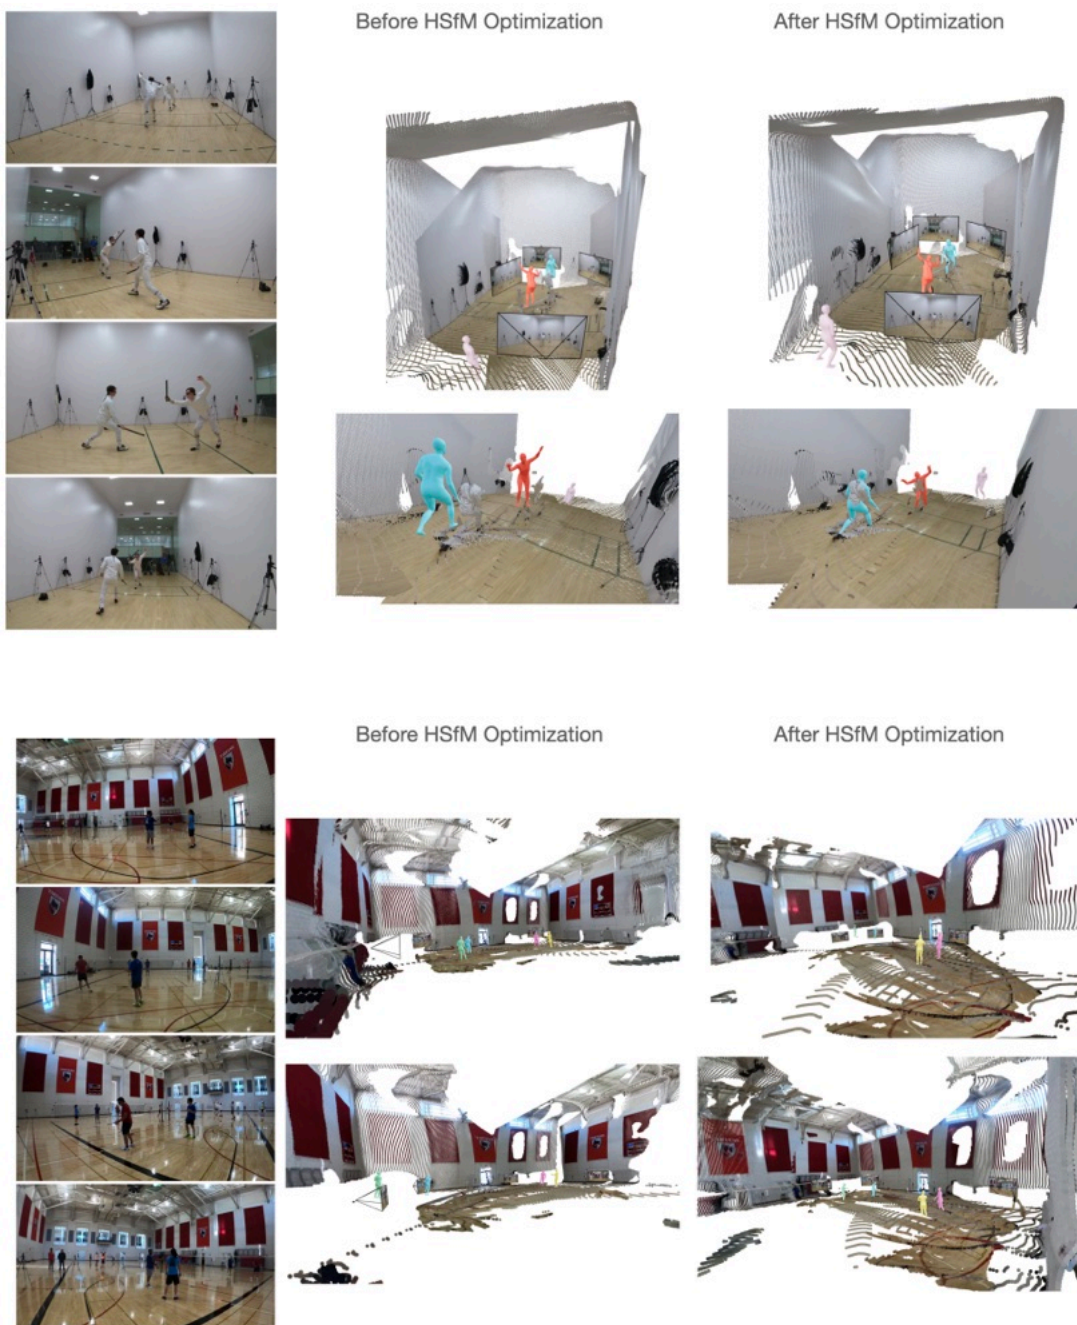

Figure S.8. Continuation of Fig. S.7
